## Correction

# Correction: Mental Health Problems and Educational Attainment in Adolescence: 9-Year Follow-Up of the TRAILS Study

The *PLOS ONE* Staff

There are errors in the numbers for Table 1. Please see the correct Table 1 here.

---

**Citation:** The *PLOS ONE* Staff (2014) Correction: Mental Health Problems and Educational Attainment in Adolescence: 9-Year Follow-Up of the TRAILS Study. *PLoS ONE* 9(12): e115070. doi:10.1371/journal.pone.0115070

**Published:** December 2, 2014

**Copyright:** © 2014 The *PLOS ONE* Staff. This is an open-access article distributed under the terms of the Creative Commons Attribution License, which permits unrestricted use, distribution, and reproduction in any medium, provided the original author and source are credited.

**Table 1.** Descriptive information of the dependent, independent and confounding variables.

| Variables                                         | Age | Educational attainment |             |              | P-value |
|---------------------------------------------------|-----|------------------------|-------------|--------------|---------|
|                                                   |     | Low                    | Medium      | High         |         |
| Gender (N, %)                                     | 11  |                        |             |              | 0.18    |
| Boys                                              |     | 55 (51.4)              | 650 (53.7)  | (58.6)       |         |
| Girls                                             |     | 52 (48.6)              | 561 (46.3)  | 163 (41.4)   |         |
| Age (mean, SD)                                    | 19  | 19.2 (0.66)            | 19.0 (0.58) | 19.1 (0.56)  | 0.01    |
| Parental educational level (N, %)                 | 11  |                        |             |              | <0.001  |
| Low                                               |     | 47 (44.3)              | (23.2)      | 25 (6.4)     |         |
| Medium                                            |     | 45 (42.5)              | (40.4)      | 69 (17.6)    |         |
| High                                              |     | 14 (13.2)              | 438 (36.4)  | 392 (76)     |         |
| Family Composition (N, %)                         | 11  |                        |             |              | <0.001  |
| 1 parent                                          |     | 37 (34.6)              | 262 (21.6)  | 60 (15.2)    |         |
| 2 parents                                         |     | 70 (65.4)              | 949 (78.4)  | 334 (84.8)   |         |
| IQ (mean, SD)                                     | 11  | 87.9 (13.8)            | 96.5 (13.1) | 110.8 (12.3) | <0.001  |
| Academic Performance (mean, SD)                   | 11  | 3.0 (0.8)              | 3.6 (0.8)   | 4.4 (0.5)    | <0.001  |
| Physical Health (N, %)                            | 11  |                        |             |              | 0.01    |
| Poor                                              |     | 3 (2.8)                | 18 (1.5)    | 8 (2.0)      |         |
| Medium                                            |     | 11 (10.3)              | 106 (8.8)   | 23 (5.8)     |         |
| Good                                              |     | 93 (86.9)              | 1087 (89.8) | 363 (92.1)   |         |
| Externalizing problems (mean, SD)                 | 11  |                        |             |              |         |
| Self-report (YSR)                                 |     | 10.2 (7.6)             | 8.9 (6.4)   | 7.8 (5.3)    | <0.001  |
| Parents' report (CBCL)                            |     | 9.5 (6.9)              | 7.8 (6.4)   | 5.3 (4.6)    | <0.001  |
| Internalizing problems (mean, SD)                 | 11  |                        |             |              |         |
| Self-report (YSR)                                 |     | 13.0 (8.7)             | 11.7 (7.5)  | 11.2 (7.1)   | 0.09    |
| Parents' report (CBCL)                            |     | 8.3 (6.6)              | 7.9 (6.1)   | 7.3 (5.9)    | 0.15    |
| Attention problems (mean, SD)                     | 11  |                        |             |              |         |
| Self-report (YSR)                                 |     | 4.9 (2.8)              | 4.5 (2.8)   | 3.9 (2.4)    | <0.001  |
| Parents' report (CBCL)                            |     | 5.8 (3.8)              | 4.5 (3.3)   | 2.3 (2.1)    | <0.001  |
| Externalizing problems (mean change since 11, SD) | 16  |                        |             |              |         |
| Self-report (YSR)                                 |     | 3.0 (8.9)              | 1.5 (7.7)   | 0.3 (6.3)    | <0.001  |
| Parents' report (CBCL)                            |     | 1.3 (7.2)              | -1.6 (6.1)  | -1.7 (4.4)   | <0.001  |
| Internalizing problems (mean change since 11, SD) | 16  |                        |             |              |         |
| Self-report (YSR)                                 |     | 1.1 (10.9)             | -1.8 (8.3)  | -2.0 (7.8)   | 0.71    |
| Parents' report (CBCL)                            |     | 0.3 (6.2)              | -1.6 (6.0)  | -2.2 (5.9)   | 0.01    |
| Attention problems (mean change since 11, SD)     | 16  |                        |             |              |         |
| Self-report (YSR)                                 |     | 1.2 (3.7)              | 0.9 (3.3)   | 0.8 (3.1)    | 0.52    |
| Parents' report (CBCL)                            |     | -0.9 (3.1)             | -0.9 (3.1)  | -0.5 (2.1)   | 0.05    |

Chi-square tests are performed for categorical variables and one-way ANOVA analyses for continuous variables.  
doi:10.1371/journal.pone.0101751.t001

## Reference

- Veldman K, Bültmann U, Stewart RE, Ormel J, Verhulst FC, et al. (2014) Mental Health Problems and Educational Attainment in Adolescence: 9-Year Follow-Up of the TRAILS Study. *PLoS ONE* 9(7): e101751. doi:10.1371/journal.pone.0101751
